# Supplementary material for: Mutational Analysis of a Red Fluorescent Protein-Based Calcium Ion Indicator
Source: PubMed Central journal article supplement (PMC3821290; doi:10.3390/s130911507), 2013-09-02
Supplement: sensors-13-11507-s001.pdf [file sensors-13-11507-s001.pdf]

Supplementary Information

## Mutational Analysis of a Red Fluorescent Protein-Based Calcium Ion Indicator. *Sensors* 2013, 13, 11507-11521

Haley J. Carlson and Robert E. Campbell \*

Department of Chemistry, University of Alberta, Edmonton, AB T6G 2G2, Canada;

E-Mail: hcarlson@ualberta.ca

\* Author to whom correspondence should be addressed; E-Mail: robert.e.campbell@ualberta.ca;

Tel.: +780-492-1849; Fax: +780-492-8231.

Supplementary Table 1. Characterization of CH-GECO2.0 and CH-GECO2.1 mutants.

| Protein    | Domain   | Mutation                                                     | Response (%) | $K_d$ (nM)                 | Hill Coefficient |
|------------|----------|--------------------------------------------------------------|--------------|----------------------------|------------------|
| CH-GECO2.0 | N/A      | N/A                                                          | 150          | 28 ± 2.4                   | 1.7 ± 0.2        |
| CH-GECO2.1 | N/A      | N/A                                                          | 250          | 6 ± 0.3                    | 1.3 ± 0.1        |
| CH-GECO2.1 | CaM      | Ser77Thr                                                     | 218          | 8 ± 1.1                    | 1.1 ± 0.1        |
| CH-GECO2.1 | CaM      | Gly21Asp                                                     | 260          | 7 ± 1.4                    | 0.7 ± 0.1        |
| CH-GECO2.1 | CaM      | Leu61Phe                                                     |              | no soluble protein         |                  |
| CH-GECO2.1 | CaM      | Gly21Asp Ser77Thr                                            | 280          | 13 ± 0.7                   | 1.2 ± 0.1        |
| CH-GECO2.1 | CaM      | Gly21Asp Leu61Phe Ser77Thr                                   | 230          | 44 ± 3.7                   | 1.1 ± 0.1        |
| CH-GECO2.1 | CaM      | Asn109Asp                                                    | 313          | 13 ± 1.6                   | 1.5 ± 0.2        |
| CH-GECO2.1 | CaM      | Ala23Asp                                                     | 307          | 7 ± 0.4                    | 1.0 ± 0.1        |
| CH-GECO2.1 | CaM      | Gly21Asp Ala23Asp Ser77Thr                                   | 270          | 5 ± 0.3                    | 1.7 ± 0.1        |
| CH-GECO2.1 | CaM      | Gly21Asp Ala23Asp Leu61Phe Ser77Thr                          | 302          | 23 ± 1.1                   | 1.3 ± 0.1        |
| CH-GECO2.1 | CaM & FP | Gly21Asp Ala23Asp Leu61Phe Ser77Thr Asp191Gly (FP)           | 356          | 21 ± 2.3                   | 1.2 ± 0.1        |
| CH-GECO2.1 | CaM & FP | Gly21Asp Ala23Asp Leu61Phe Ser77Thr Asn109Asp Asp191Gly (FP) | 372          | 35 ± 2.1                   | 1.5 ± 0.1        |
| CH-GECO2.1 | FP       | Asp191Gly                                                    | 211          | 8 ± 1.4                    | 1.0 ± 0.2        |
| CH-GECO2.1 | FP       | Thr147Ile                                                    | 115          | 5 ± 0.3                    | 1.9 ± 0.2        |
| CH-GECO2.1 | FP       | Lys70Gln                                                     |              | no red fluorescent protein |                  |
| CH-GECO2.1 | FP       | Glu148Gln                                                    |              | no red fluorescent protein |                  |
| CH-GECO2.1 | FP       | His75Gln                                                     | 158          | 3 ± 0.3                    | 1.4 ± 0.1        |
| CH-GECO2.1 | FP       | Tyr193Phe                                                    | 305          | 5 ± 0.3                    | 1.2 ± 0.1        |
| CH-GECO2.1 | CaM      | Asp1Gln                                                      | 307          | 53 ± 4.2                   | 1.7 ± 0.2        |
| CH-GECO2.1 | FP       | Lys166Arg                                                    | 200          | 3 ± 0.5                    | 1.2 ± 0.1        |

Supplementary Table 1. Cont.

| Protein    | Domain | Mutation  | Response (%) | $K_d$ (nM)                      | Hill Coefficient |
|------------|--------|-----------|--------------|---------------------------------|------------------|
| CH-GECO2.1 | FP     | His172Gln | 304          | $3 \pm 0.3$                     | $1.1 \pm 0.1$    |
| CH-GECO2.1 | FP     | His204Gln | 285          | $7 \pm 0.4$                     | $1.3 \pm 0.1$    |
| CH-GECO2.1 | FP     | Tyr214Phe | 232          | $8 \pm 0.4$                     | $1.2 \pm 0.1$    |
| CH-GECO2.1 | FP     | Trp83Phe  | 280          | $7 \pm 0.7$                     | $1.1 \pm 0.1$    |
| CH-GECO2.1 | FP     | Gly159Ser | 184          | $8 \pm 1.0$                     | $0.9 \pm 0.1$    |
| CH-GECO2.1 | FP     | Gln163Lys |              | no response to $\text{Ca}^{2+}$ |                  |
| CH-GECO2.1 | FP     | Gln163Met | 54           | $2 \pm 0.3$                     | $1.2 \pm 0.2$    |
| CH-GECO2.1 | FP     | Gln163Asp |              | no response to $\text{Ca}^{2+}$ |                  |

**Supplementary Figure 1.** Absorbance scans and pH titration data for CH-GECO2.1 with R-GECO1 linkers, with or without the Gln163Lys substitution. **(A)** Absorbance spectra for CH-GECO2.1-PVV and CH-GECO2.1-PVV Q163K in the presence and absence of  $\text{Ca}^{2+}$ . In both instances there is a much larger portion of protein in the blue form and neither mutant shows a significant absorbance change in the presence of  $\text{Ca}^{2+}$ . **(B)** Absorbance spectra for CH-GECO2.1-PVV-ATA Q163K in the presence and absence of  $\text{Ca}^{2+}$ . The absorbance spectrum of CH-GECO2.1-PVV from (A) is shown for reference. **(C)** pH titration data of CH-GECO2.1-PVV and CH-GECO2.1-PVV-ATA Q163K in the presence and absence of  $\text{Ca}^{2+}$ .

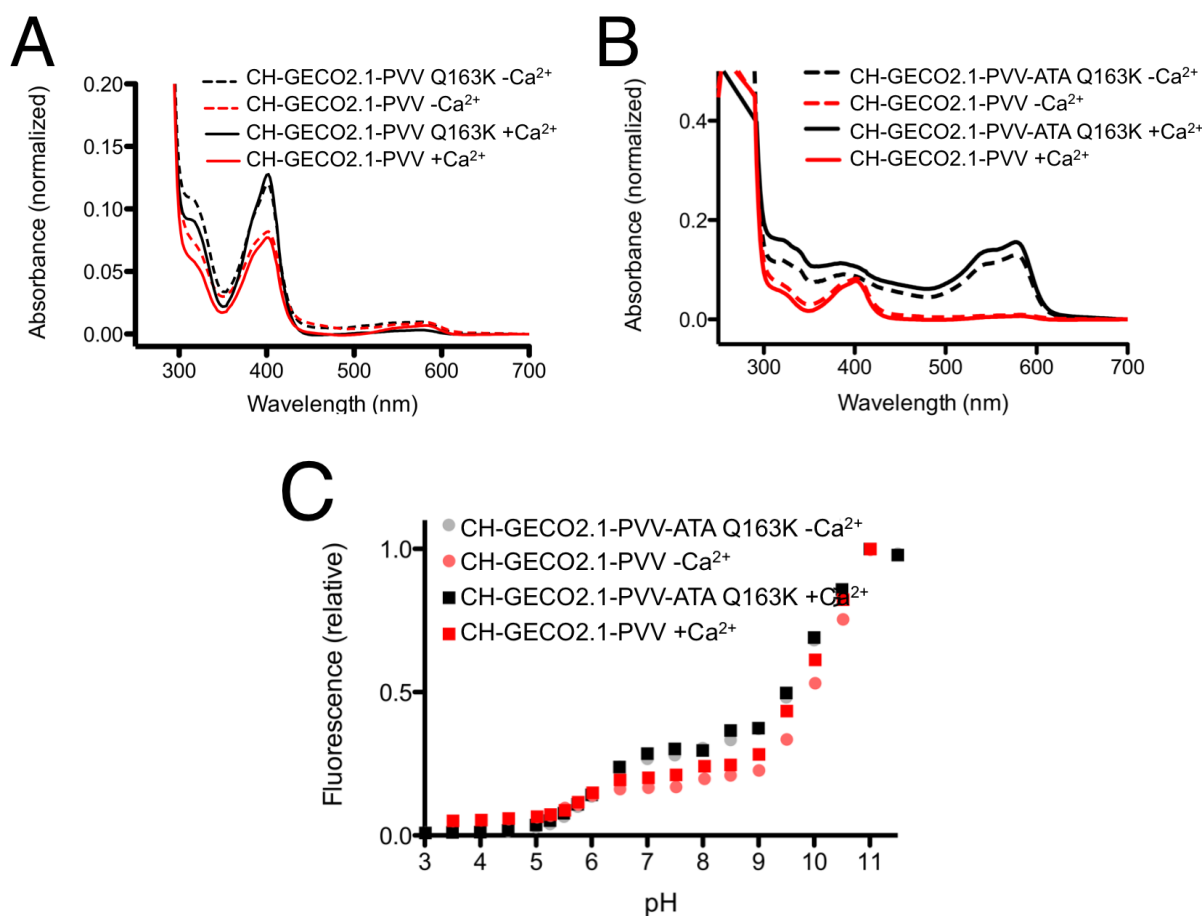

**Supplementary Figure 2.** The location of residues mutated in an effort to gain insight into the mechanism of CH-GECO2.1. (A) The hydrogen bond network connecting His75 and residues in close proximity to the chromophore, as observed in the X-ray crystal structure of mCherry (PDB ID 2H5Q) [1]. (B) Additional candidate residues targeted for mutagenesis, represented using the R-GECO1 crystal structure [2]. As the structure corresponds to R-GECO1, and the labels are for CH-GECO2.1, the actual side chain shown does not necessarily correspond to the amino acid name indicated in the label.

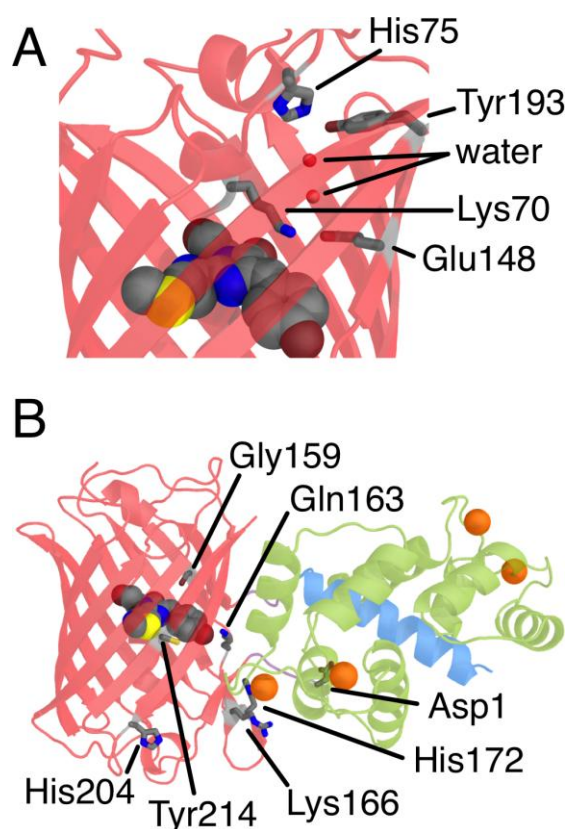

### Supplementary References

1. Shu, X.; Shaner, N.C.; Yarbrough, C.A.; Tsien, R.Y.; Remington, S.J. Novel chromophores and buried charges control color in mFruits. *Biochemistry* **2006**, *45*, 9639–9647.
2. Akerboom, J.; Calderón, N.C.; Tian, L.; Wabnig, S.; Prigge, M.; Tolö, J.; Gordus, A.; Orger, M.B.; Severi, K.E.; Macklin, J.J.; *et al.* Genetically encoded calcium indicators for multi-color neural activity imaging and combination with optogenetics. *Front. Mol. Neurosci.* **2013**, *6*, 2.

© 2013 by the authors; licensee MDPI, Basel, Switzerland. This article is an open access article distributed under the terms and conditions of the Creative Commons Attribution license (<http://creativecommons.org/licenses/by/3.0/>).
